# Supplementary material for: Si nanorod arrays modified with metal–organic segments as anodes in lithium ion batteries
Source: Royal Society of Chemistry journal article supplement (doi:10.1039/c7ra10905a), 2017-01-01
Supplement: c7ra10905a1.pdf [file c7ra10905a1.pdf]

## Supporting Information

### **Si Nanorods Arrays Modified by Metal-Organic Segments as Anodes in Lithium Ion Batteries**

*Yingjian Yu, Chuang Yue, Yingzi Han, Chuanhui Zhang, Mingsen Zheng, Binbin Xu, Shuichao Lin,\* Jing Li\*, and Junyong Kang*

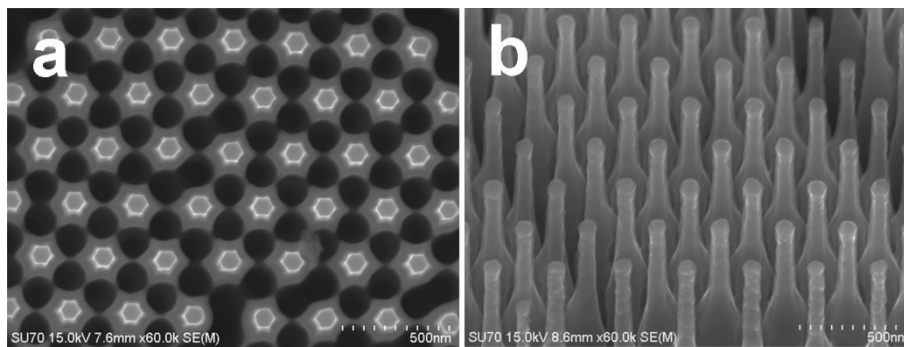

**Figure S1.** (a) Vertical-view and (b) lateral-view SEM images of Si NRs.

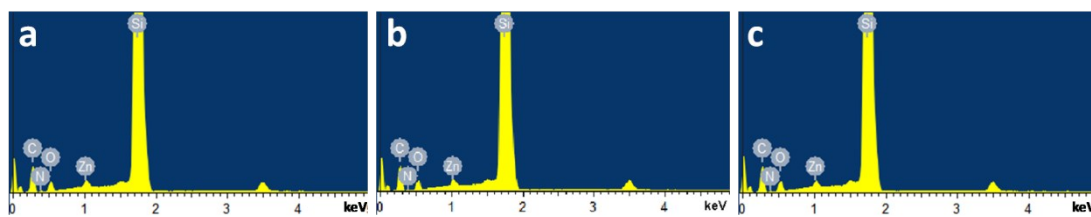

**Figure S2.** The energy dispersive X-ray (EDX) spectra of MOS/Si NRs with reaction time of (a) 4 h and (b) 12 h at the lower solution concentration; (c) The EDX spectrum of MOS/Si NRs with reaction time of 4 h at the higher solution concentration.

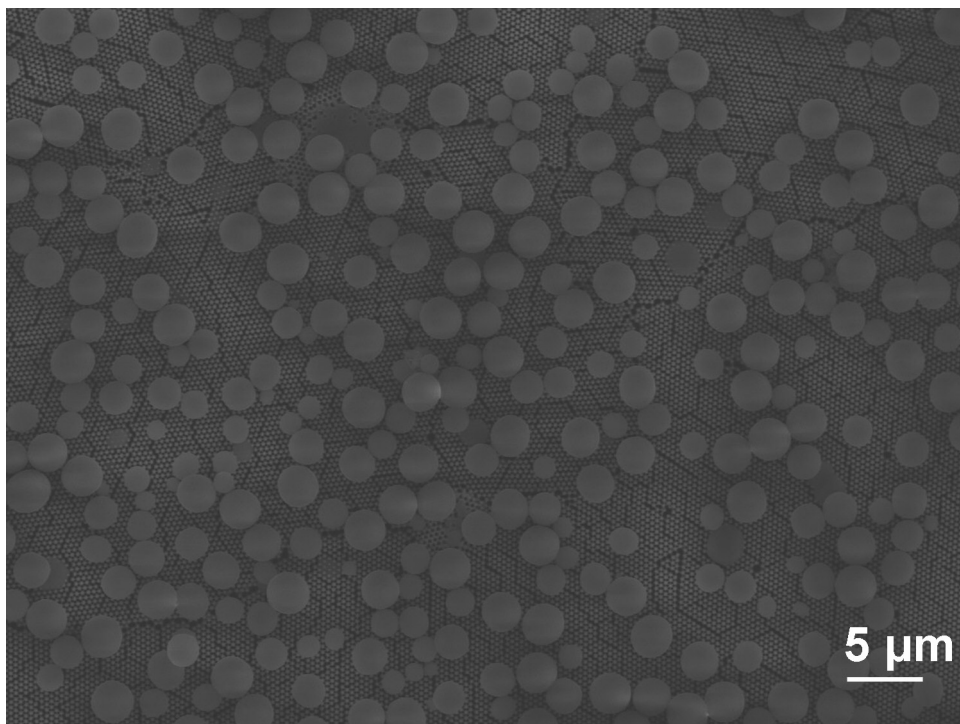

**Figure S3.** Vertical-view SEM image of ZIF-61/Si NRs over a large area.

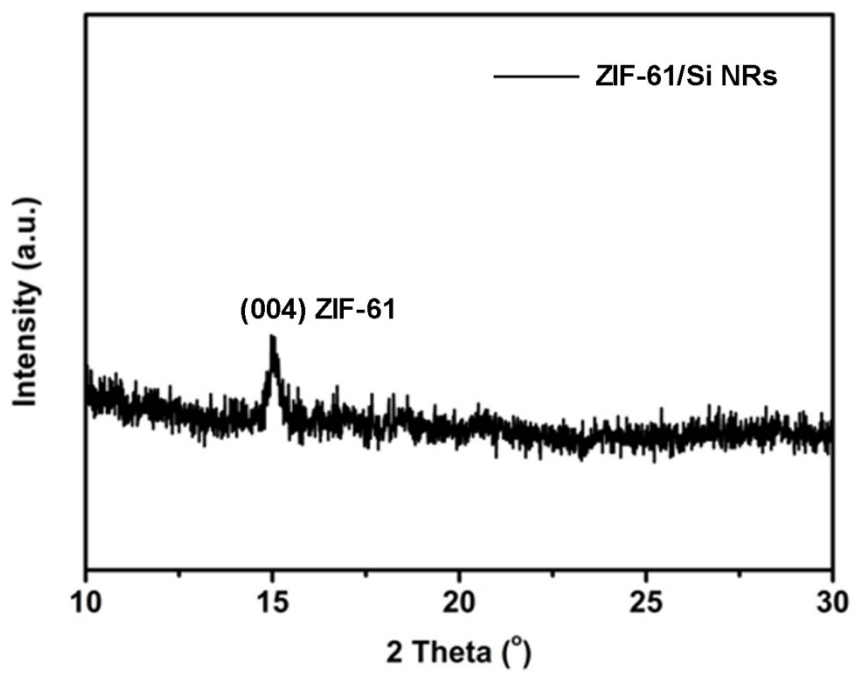

**Figure S4.** XRD pattern of ZIF-61/Si NRs.

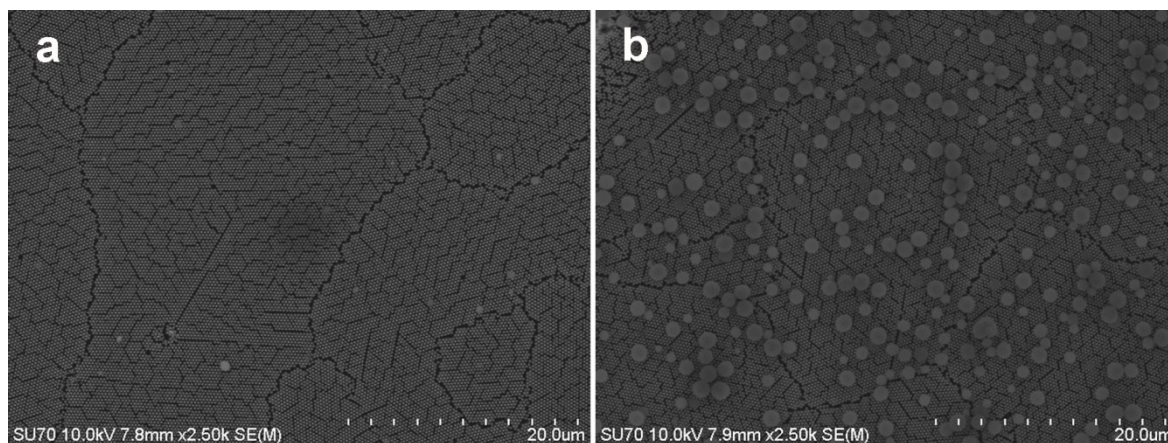

**Figure S5.** Vertical-view SEM images of composite Si NRs over a large area fabricated by (a) 6-hour and (b) 12-hour reactions.

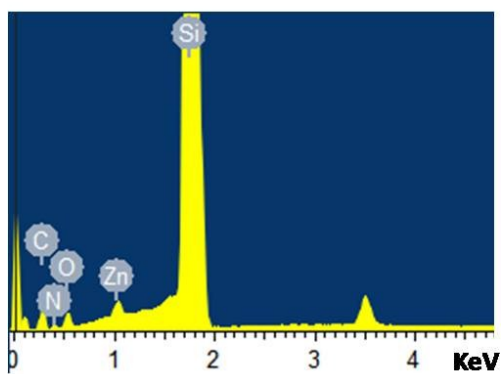

| Element   | wt%   | at%   |
|-----------|-------|-------|
| <b>C</b>  | 16.82 | 30.84 |
| <b>N</b>  | 2.67  | 4.2   |
| <b>O</b>  | 3.09  | 4.26  |
| <b>Si</b> | 77.42 | 60.7  |
| <b>Zn</b> | 0.00  | 0.00  |

**Figure S6.** The energy dispersive X-ray (EDX) spectrum of Si NRs under ZIF-61 crystals with corresponding elements contents.

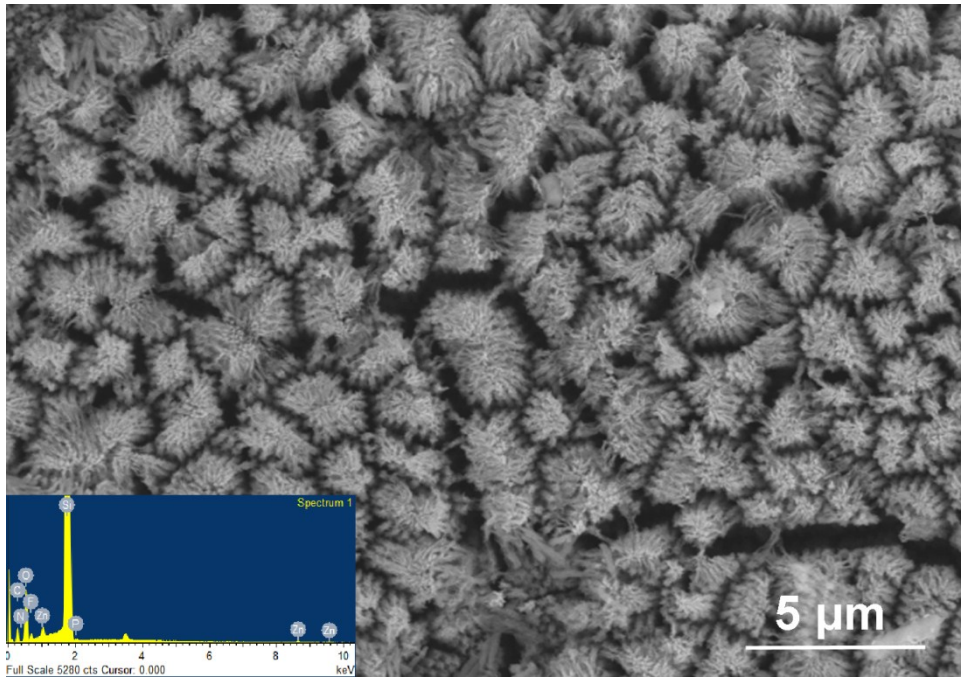

**Figure S7.** The SEM image with the inset of EDS spectrum of MOS/Si NRs after lithiation/delithiation processes for 50 cycles.



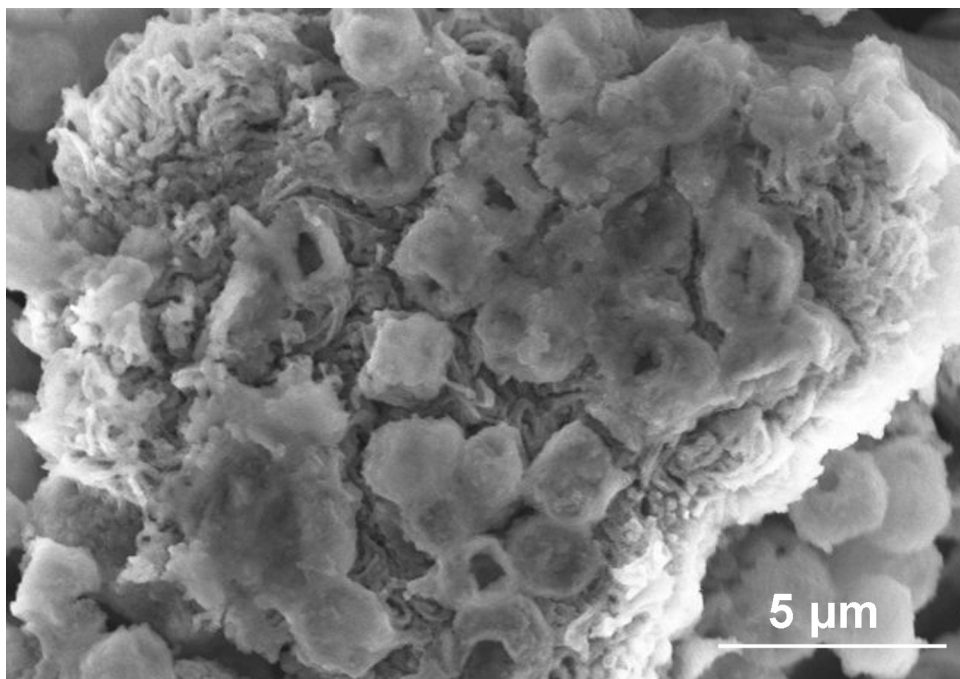

**Figure S8.** The SEM image of ZIF-61/Si NRs after lithiation/delithiation processes for 50 cycles.
